# Supplementary material
Source: publisher figshare collection journal article supplement (https://frontiersin.figshare.com/ndownloader/files/18016349)
Supplement: Supplementary file 1 [file 18016349]

**Title: Short term effects of Hurricane Irma and cyanobacterial blooms on ammonium cycling along a freshwater­–estuarine continuum in south Florida.**

Justyna J. Hampel1, Mark J. McCarthy1, Megan H. Reed1, and Silvia E. Newell1

Frontiers in Marine Science

SI Materials

| Table 1. Turbidity and total suspended solids (TSS) in St. Lucie Estuary and Lake Okeechobee before (08/17) and after Hurricane Irma (09/17). Data from DB Hydro database (South Florida Water Management District) | | | | |  |  |  |
| --- | --- | --- | --- | --- | --- | --- | --- |
| Station | Date | Turbidity (NTU) | TSS (mg L) |
| SLE5 | 08/17 | 9.7 | 12 |
|  | 09/17 | 46 | 30 |
| SLE7 | 08/17 | 7.2 | 9 |
|  | 09/17 | 46 | 22 |
| LO04 | 08/17 | 24 | 25 |
|  | 09/17 | 114 | 81 |
| LZ40 | 08/17 | 23 | 16 |
|  | 09/17 | 82 | 49 |
